# Supplementary material
Source: PubMed Central journal article supplement (PMC2214708)
Supplement: JCI0833970sd.pdf [file JCI0833970sd.pdf]

Supplementary Table 1. Summary of the effects of CLDN19 and CLDN16/19 co-expression upon permeability of Mg<sup>++</sup> in LLC-PK1 cells.

| Construct                               | vector      | CLDN19      | CLDN19+CLDN16 co-expression |
|-----------------------------------------|-------------|-------------|-----------------------------|
| P <sub>Mg</sub> (10 <sup>-6</sup> cm/s) | 5.132±0.085 | 3.958±0.049 | 4.174±0.054                 |

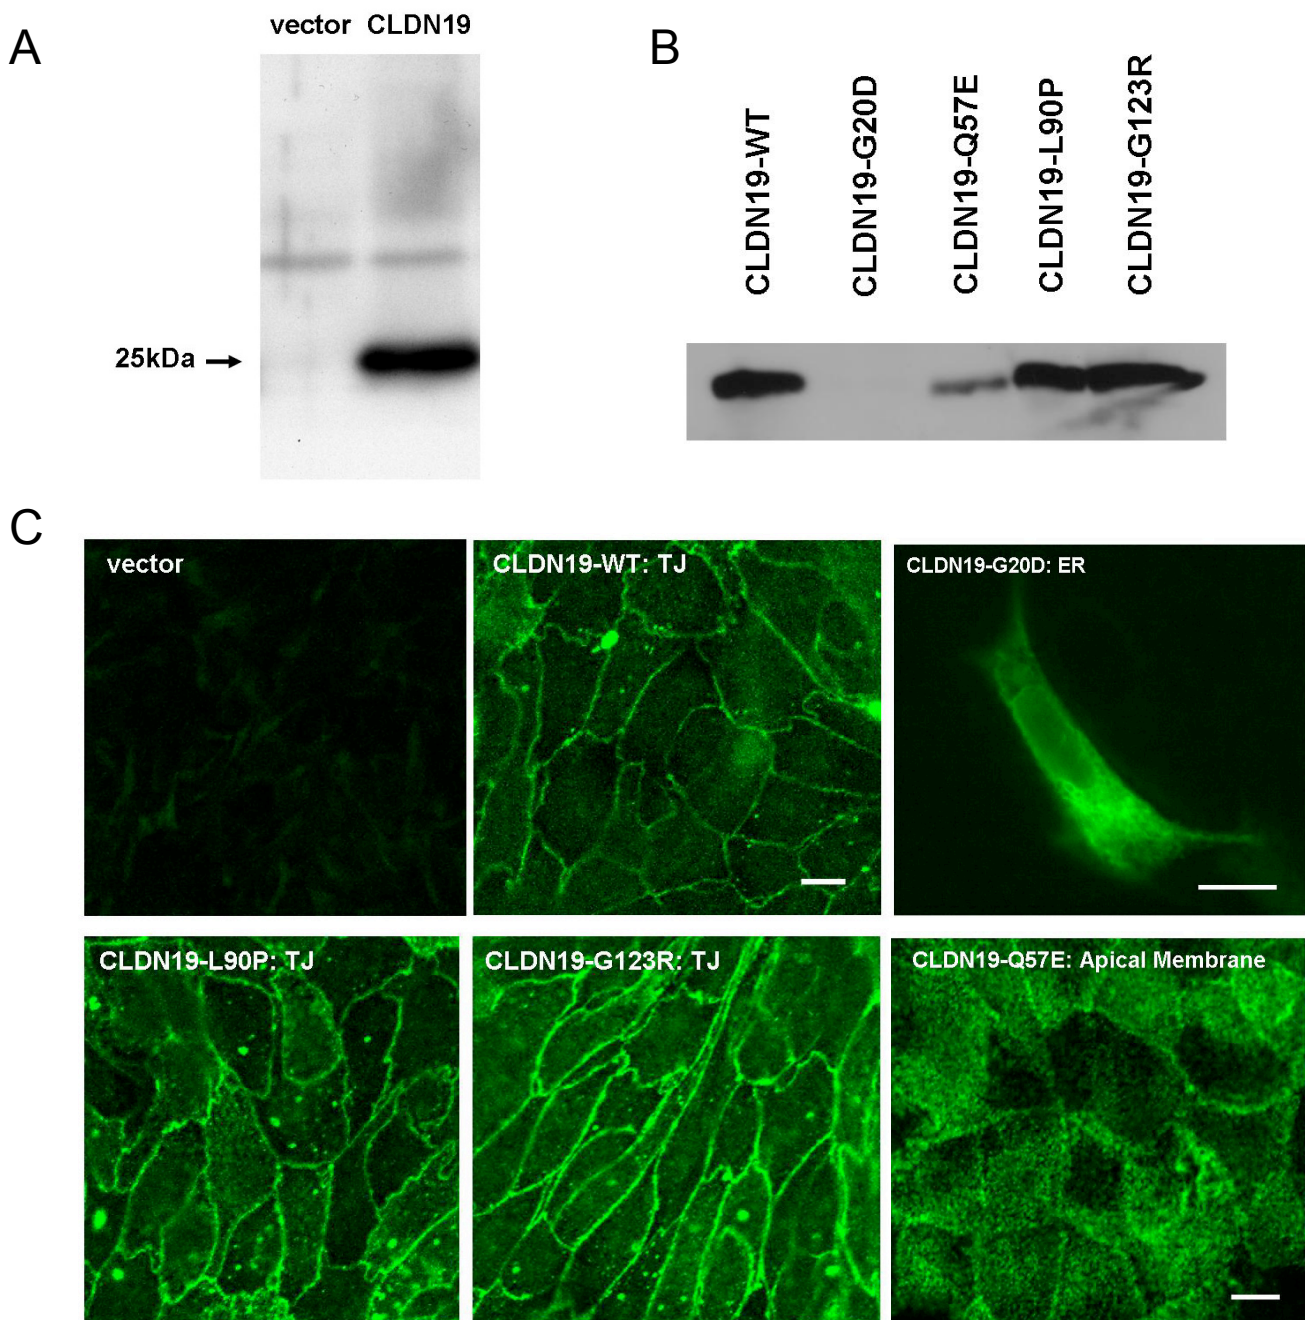

**Figure S1.** Expression of CLDN19 in LLC-PK1 cells. (A) Western immunoblot showing the electrophoretic mobility of CLDN19. (B) Western immunoblot of expression of CLDN19 mutants. Notably, CLDN19-G20D mutant protein has a low expression level (seen as a weak band after prolonged exposure). (C) Confocal microscopy showing the subcellular localization of CLDN19 and CLDN19 mutants. The confinement of CLDN19-G20D in the ER suggests that it is not properly folded, and tends to be less stable and susceptible to degradation. TJ: tight junction; ER: endoplasmic reticulum. Bar, 10µm.

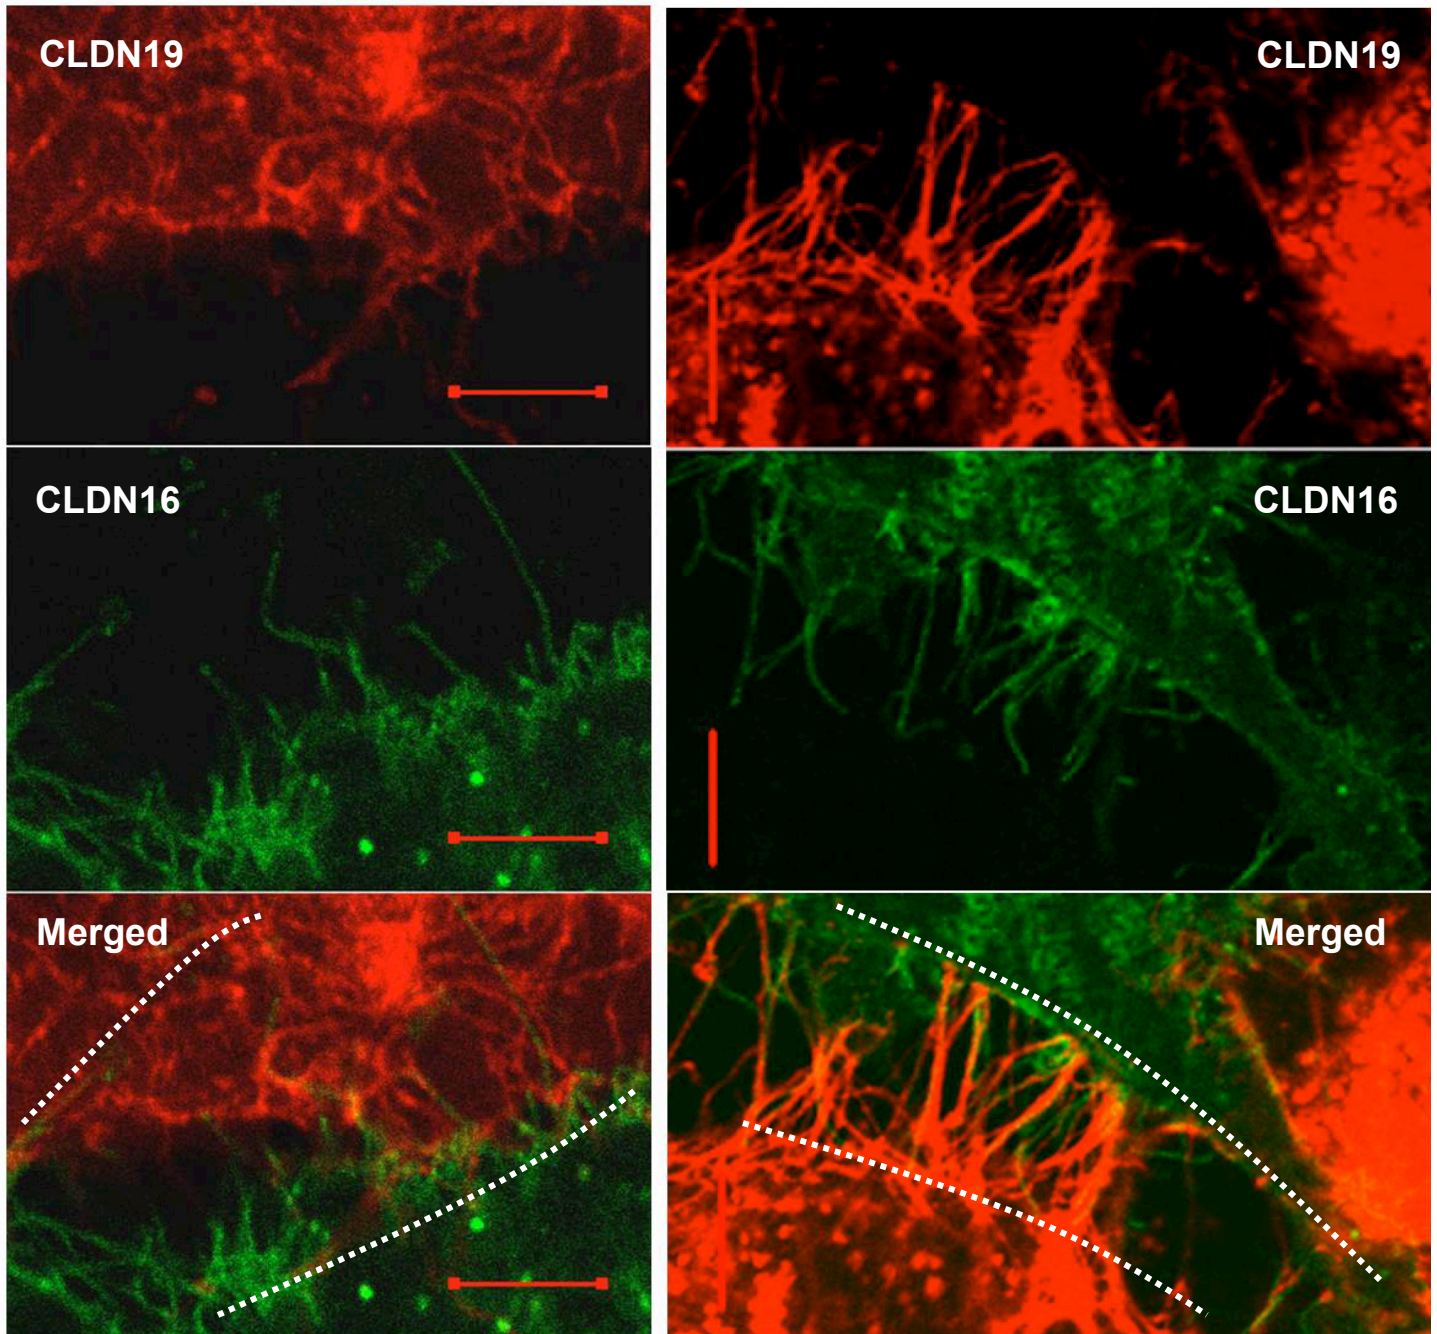

**Figure S2.** Confocal microscopy showing the subcellular localization of CLDN19 and CLDN16 at areas of cell-cell contact. L fibroblasts expressing CLDN19 and CLDN16 respectively were co-cultured to confluence. The areas of cell-cell contact were examined on the same plane and delineated using white dotted lines. Note the lack of co-localization between CLDN19 and CLDN16 at these areas, indicating the lack of heterotypic interaction between the pair of claudins. Bar, 10 $\mu$ m.
